# Supplementary material for: Out-of-School Sports Participation Is Positively Associated with Physical Literacy, but What about Physical Education? A Cross-Sectional Gender-Stratified Analysis during the COVID-19 Pandemic among High-School Adolescents
Source: MDPI journal article supplement (doi:10.3390/children9050753), 2022-05-20
Supplement: s1 [file s1]

**Table S1.** Descriptive statistics and differences between groups based on sport participation—total sample.

|                                      | Athletic Boys<br>( <i>n</i> = 69) |          | Non Athletic<br>Boys ( <i>n</i> = 38) |          | <i>t</i> -Test/MW Test          |          |
|--------------------------------------|-----------------------------------|----------|---------------------------------------|----------|---------------------------------|----------|
|                                      | Mean                              | Std.Dev. | Mean                                  | Std.Dev. | <i>t</i> -Value/ <i>Z</i> Value | <i>p</i> |
| Body height (cm)                     | 174.59                            | 9.94     | 171.40                                | 8.70     | 2.96                            | 0.001    |
| Body mass (kg)                       | 67.21                             | 14.23    | 62.59                                 | 12.73    | 2.96                            | 0.001    |
| Body mass index                      | 21.90                             | 3.37     | 21.21                                 | 3.41     | 1.75                            | 0.08     |
| Broad jump (cm)                      | 196.79                            | 32.96    | 171.46                                | 29.24    | 7.04                            | 0.001    |
| Sit and reach (cm)                   | 10.51                             | 8.11     | 11.71                                 | 15.90    | −0.80                           | 0.42     |
| Sit-ups (repetitions)                | 61.89                             | 12.24    | 51.50                                 | 11.07    | 7.70                            | 0.001    |
| Beep test (level)                    | 10.82                             | 3.00     | 8.28                                  | 2.42     | 8.13                            | 0.001    |
| CAPL-2-KU                            | 9.19                              | 2.01     | 8.64                                  | 2.22     | 2.23                            | 0.03     |
| PLAYself total                       | 74.51                             | 10.52    | 64.44                                 | 12.64    | 7.40                            | 0.001    |
| PLAY environment <sup>MW</sup>       | 57.34                             | 16.41    | 45.86                                 | 16.62    | 5.85                            | 0.001    |
| PLAY self-description <sup>MW</sup>  | 80.30                             | 14.29    | 64.42                                 | 16.50    | 8.03                            | 0.001    |
| PLAY literacy <sup>MW</sup>          | 79.71                             | 18.64    | 80.62                                 | 19.07    | −0.44                           | 0.66     |
| PLAY numeracy <sup>MW</sup>          | 64.94                             | 24.14    | 64.76                                 | 22.79    | 0.17                            | 0.86     |
| PLAY physical literacy <sup>MW</sup> | 90.08                             | 13.90    | 85.22                                 | 17.84    | 2.23                            | 0.03     |

Legend: <sup>MW</sup> indicates variables where differences between groups were calculated by Mann-Whitney test.

**Table S2.** Descriptive statistics and differences between groups based on age—total sample.

|                                      | Younger<br>Adolescents<br>( <i>n</i> = 56) |          | Older<br>Adolescents<br>( <i>n</i> = 51) |          | <i>t</i> -Test/MW Test           |          |
|--------------------------------------|--------------------------------------------|----------|------------------------------------------|----------|----------------------------------|----------|
|                                      | Mean                                       | Std.Dev. | Mean                                     | Std.Dev. | <i>t</i> -Value/ <i>Z</i> -Value | <i>p</i> |
| Body height (cm)                     | 172.53                                     | 9.23     | 173.19                                   | 9.59     | −0.60                            | 0.55     |
| Body mass (kg)                       | 63.00                                      | 14.16    | 66.32                                    | 12.93    | −2.12                            | 0.03     |
| Body mass index                      | 21.04                                      | 3.62     | 21.99                                    | 3.13     | −2.44                            | 0.02     |
| Broad jump (cm)                      | 177.89                                     | 29.75    | 188.04                                   | 35.95    | −2.65                            | 0.01     |
| Sit and reach (cm)                   | 9.70                                       | 8.43     | 12.51                                    | 15.88    | −1.89                            | 0.06     |
| Sit-ups (repetitions)                | 54.17                                      | 12.09    | 58.27                                    | 12.99    | −2.82                            | 0.01     |
| Beep test (level)                    | 9.48                                       | 2.90     | 9.43                                     | 3.07     | 0.14                             | 0.89     |
| CAPL-2-KU                            | 8.80                                       | 2.19     | 8.98                                     | 2.09     | −0.73                            | 0.46     |
| PLAYself total                       | 69.13                                      | 13.35    | 69.09                                    | 12.15    | 0.03                             | 0.98     |
| PLAY environment <sup>MW</sup>       | 50.98                                      | 18.15    | 51.35                                    | 16.86    | −0.18                            | 0.86     |
| PLAY self-description <sub>MW</sub>  | 71.92                                      | 17.72    | 71.64                                    | 17.16    | 0.14                             | 0.89     |
| PLAY literacy <sup>MW</sup>          | 78.54                                      | 20.04    | 81.75                                    | 17.58    | −1.47                            | 0.14     |
| PLAY numeracy <sup>MW</sup>          | 65.02                                      | 23.50    | 64.69                                    | 23.36    | 0.12                             | 0.90     |
| PLAY physical literacy <sub>MW</sub> | 88.94                                      | 16.43    | 86.09                                    | 16.09    | 1.51                             | 0.13     |

Legend: <sup>MW</sup> indicates variables where differences between groups were calculated by Mann-Whitney test.

**Table S3.** Correlations between study variables with participants' age and PE grade.

|                        | Age   |          | PE Grade |          |
|------------------------|-------|----------|----------|----------|
|                        | R     | <i>p</i> | R        | <i>p</i> |
| Body height (cm)       | 0.02  | 0.76     | 0.15     | 0.01     |
| Body mass (kg)         | 0.18  | 0.001    | −0.04    | 0.45     |
| Body mass index        | 0.25  | 0.001    | −0.16    | 0.01     |
| Broad jump (cm)        | 0.13  | 0.02     | 0.41     | 0.001    |
| Sit and reach (cm)     | 0.14  | 0.01     | 0.11     | 0.05     |
| Sit-ups (repetitions)  | 0.14  | 0.02     | 0.47     | 0.001    |
| Beep test (level)      | 0.06  | 0.29     | 0.42     | 0.001    |
| CAPL-2-KU              | 0.17  | 0.001    | 0.13     | 0.02     |
| PLAYself total         | −0.01 | 0.88     | 0.39     | 0.001    |
| PLAY environment       | 0.03  | 0.60     | 0.34     | 0.001    |
| PLAY self-description  | −0.06 | 0.32     | 0.44     | 0.001    |
| PLAY literacy          | 0.06  | 0.31     | −0.07    | 0.21     |
| PLAY numeracy          | 0.04  | 0.52     | 0.00     | 0.97     |
| PLAY physical literacy | −0.04 | 0.51     | 0.09     | 0.11     |

**Table S4.** Correlations between physical fitness test results and physical literacy.

|                        | Broad Jump |          | Sit-and-Reach |          | Sit-Ups |          | Beep Test |          |
|------------------------|------------|----------|---------------|----------|---------|----------|-----------|----------|
|                        | R          | <i>p</i> | R             | <i>p</i> | R       | <i>p</i> | R         | <i>p</i> |
| CAPL-2-KU              | 0.00       | 0.97     | 0.11          | 0.05     | 0.03    | 0.61     | 0.00      | 0.98     |
| PLAYself total         | 0.32       | 0.001    | 0.08          | 0.18     | 0.42    | 0.001    | 0.47      | 0.001    |
| PLAY environment       | 0.31       | 0.001    | 0.07          | 0.26     | 0.42    | 0.001    | 0.41      | 0.001    |
| PLAY self-description  | 0.43       | 0.001    | 0.02          | 0.75     | 0.51    | 0.001    | 0.56      | 0.001    |
| PLAY literacy          | −0.20      | 0.001    | 0.12          | 0.04     | −0.08   | 0.19     | −0.10     | 0.08     |
| PLAY numeracy          | −0.01      | 0.90     | 0.06          | 0.29     | −0.07   | 0.26     | −0.03     | 0.64     |
| PLAY physical literacy | −0.01      | 0.87     | 0.11          | 0.07     | 0.05    | 0.39     | 0.17      | 0.01     |
